# Supplementary material for: Conversion of clinically isolated syndrome to multiple sclerosis: a prospective multi-center study in Eastern India
Source: PubMed Central journal article supplement — Mult Scler J Exp Transl Clin. 2019 May 13;5(2):2055217319849721. doi: 10.1177/2055217319849721 (PMC6572895; doi:10.1177/2055217319849721), 2019-05-13
Supplement: Supplemental_Material.pdf [file Supplemental_Material.pdf]

**Appendix 1. Cerebro-spinal magnetic resonance imaging data of clinically isolated syndrome cohort**

| <b>Brain MRI findings</b>         | <b>Number of lesions</b> |
|-----------------------------------|--------------------------|
| Total number of lesions           |                          |
| Cerebral atrophy                  | Yes / No                 |
| Location / Distribution           |                          |
| Supra-tentorial                   |                          |
| Periventricular                   |                          |
| Deep white matter                 |                          |
| Juxta-cortical                    |                          |
| Corpus callosum                   |                          |
| Infra-tentorial                   |                          |
| Cerebellum                        |                          |
| Midbrain                          |                          |
| Pons                              |                          |
| Medulla                           |                          |
| Appearance of lesions             |                          |
| Gadolinium enhancement (total no) |                          |
| Large (>5 mm)                     |                          |
| Oval / Ovoid                      |                          |
| Confluent                         |                          |
| Perpendicular                     |                          |
| Hypo-intense on T1                |                          |
| Black hole on T1                  |                          |

| <b>Spinal MRI features</b>            | <b>Number of lesions</b> |
|---------------------------------------|--------------------------|
| Total number of lesion                |                          |
| Size (no. of vertebral segments)      |                          |
| Large lesions (>2 vertebral segments) | Yes / No                 |
| Location                              |                          |
| Cervical                              |                          |
| Thoracic                              |                          |
| Cervico-thoracic                      |                          |
| Thoraco-lumbar                        |                          |
| Lumbar or sacral                      |                          |
| Entire spine                          |                          |
| Cross-section appearance              |                          |
| Central                               |                          |
| Lateral                               |                          |
| Complete cross-section                |                          |
| T1-weighted images                    |                          |
| Gadolinium enhancement                |                          |
| Hypo-intense lesions                  |                          |
| Black holes (syrinx-like)             | Yes / No                 |
| Swelling                              | Yes / No                 |
| Atrophy                               | Yes / No                 |
